# Supplementary material for: MicroRNA-92a-1–5p increases CDX2 by targeting FOXD1 in bile acids-induced gastric intestinal metaplasia
Source: PubMed Central journal article supplement — Gut. 2019 Jan 11;68(10):1751–63. doi: 10.1136/gutjnl-2017-315318 (PMC6839796; doi:10.1136/gutjnl-2017-315318), 2019-01-11
Supplement: gutjnl-2017-315318supp002.pdf [file gutjnl-2017-315318supp002.pdf]

**Figure S1**

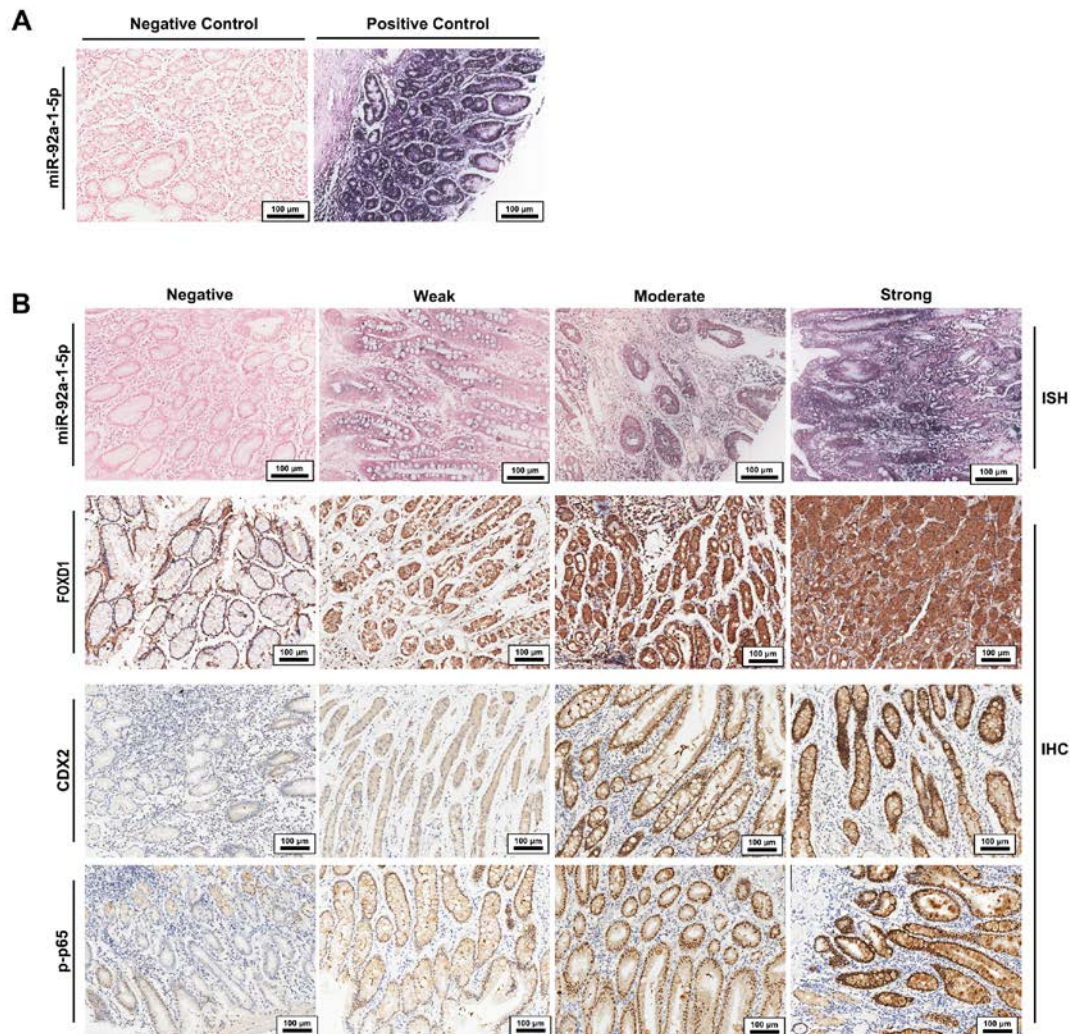

**Supplemental Figure S1 Representative Images of ISH and IHC with different intensity.**

(A) ISH were performed in IM tissues with LNA-modified and 5'- and 3'-DIG-labeled oligonucleotide probes. Positive control: U6 snRNA. Negative control: scrambled miRNA control.

(B) Representative Images of ISH and IHC with different intensity of miR-92a-1-5p, FOXD1, CDX2 and p-p65. The intensity of staining was divided into four grades (intensity scores): negative (0), weak (1), moderate (2) and strong (3) and used in the calculation of histological score (Supplementary Materials and Methods).

## Figure S2

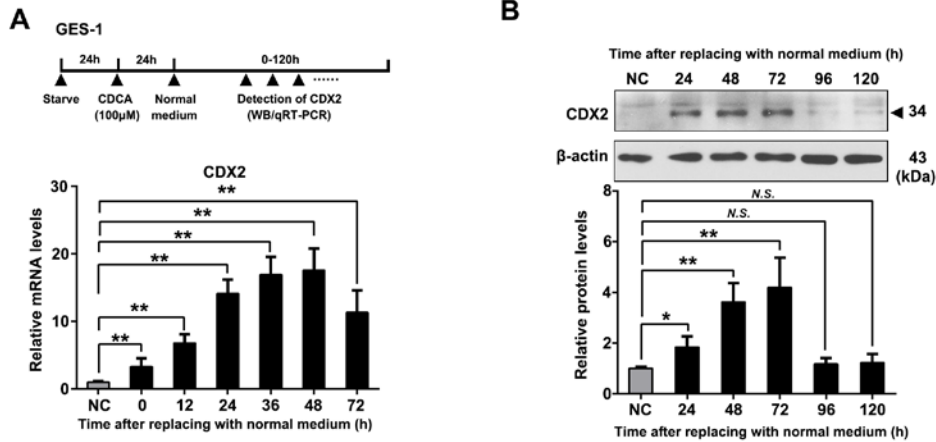

### Supplemental Figure S2 CDX2 expression at different time points after ending of bile acids stimulation.

(A) Top: Workflow in this figure. GES-1 cells were treated with CDCA (100µM) for 24h after 24h starvation. The expression of CDX2 were detected at different time points after replacing with normal medium. Bottom: qRT-PCR results of CDX2 expression at different time points after replacing with normal medium. GAPDH RNA was used as internal control. (B) Top: Representative images of western blotting of CDX2 at different time points after replacing with normal medium. β-actin levels were used as internal control in immunoblots. Bottom: quantification of immunoblots normalized as to β-actin. Means ± SEM of a representative experiment (n = 3) performed in triplicates are shown. \*, P < 0.05; \*\*, P < 0.01.

**Figure S3**

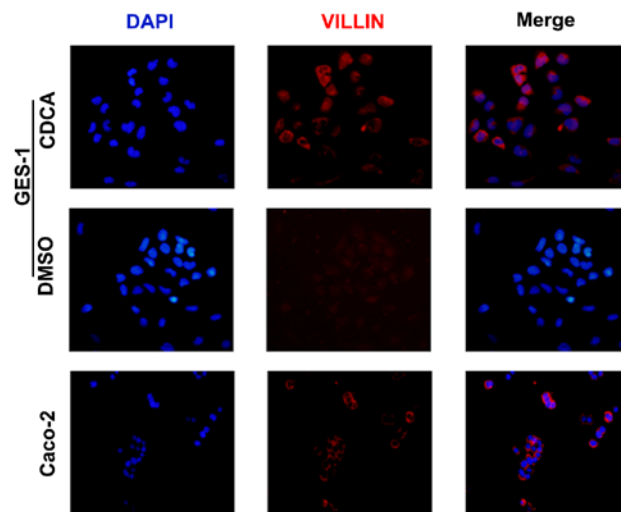

**Supplemental Figure S3 Bile acids induced VIL1 expression in GES-1 cells.**

Immunofluorescence showed VIL1 expression in GES-1 cells treated with CDCA (100  $\mu$ M) for 24h. HT-29 as a positive control. Representative images in one of three independent experiments are shown.

**Figure S4**

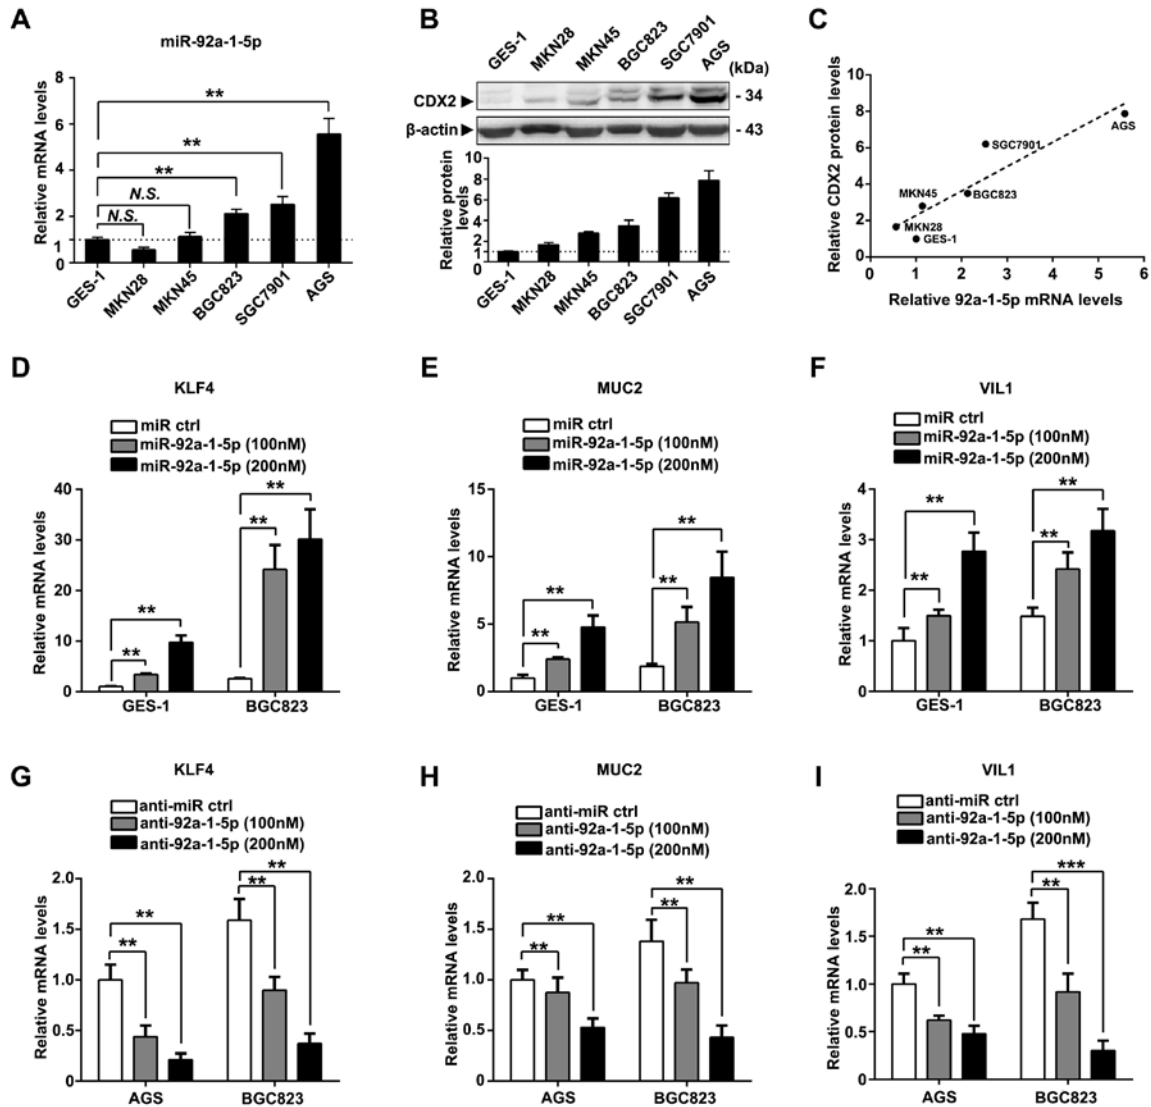

**Supplemental Figure S4 miR-92a-1-5p increases KLF4, MUC2 and VIL1 expression in gastric cells.**

(A) qRT-PCR results of miR-92a-1-5p in GES-1 and GC cell lines normalized as to expression of U6. (B) Western blot for CDX2 in indicated cell lines normalized as to expression of  $\beta$ -actin. (C) A positive correlation between levels of CDX2 and miR-92a-1-5p in gastric cell lines. (D-F) GES-1 and BGC823 cells were transfected as in Fig. 3A and qRT-PCR were used to examine the expression of KLF4 (D) MUC2 (E) and VIL1 (F). (G-I) AGS and BGC823 cells were transfected as in Fig. 3B and qRT-PCR were used to examine the expression of KLF4 (G) MUC2 (H) and VIL1 (I). GAPDH RNA was used as internal control Means  $\pm$  SEM of a representative experiment (n = 3) performed in triplicates are shown. \*, P < 0.05; \*\*, P < 0.01.

**Figure S5**

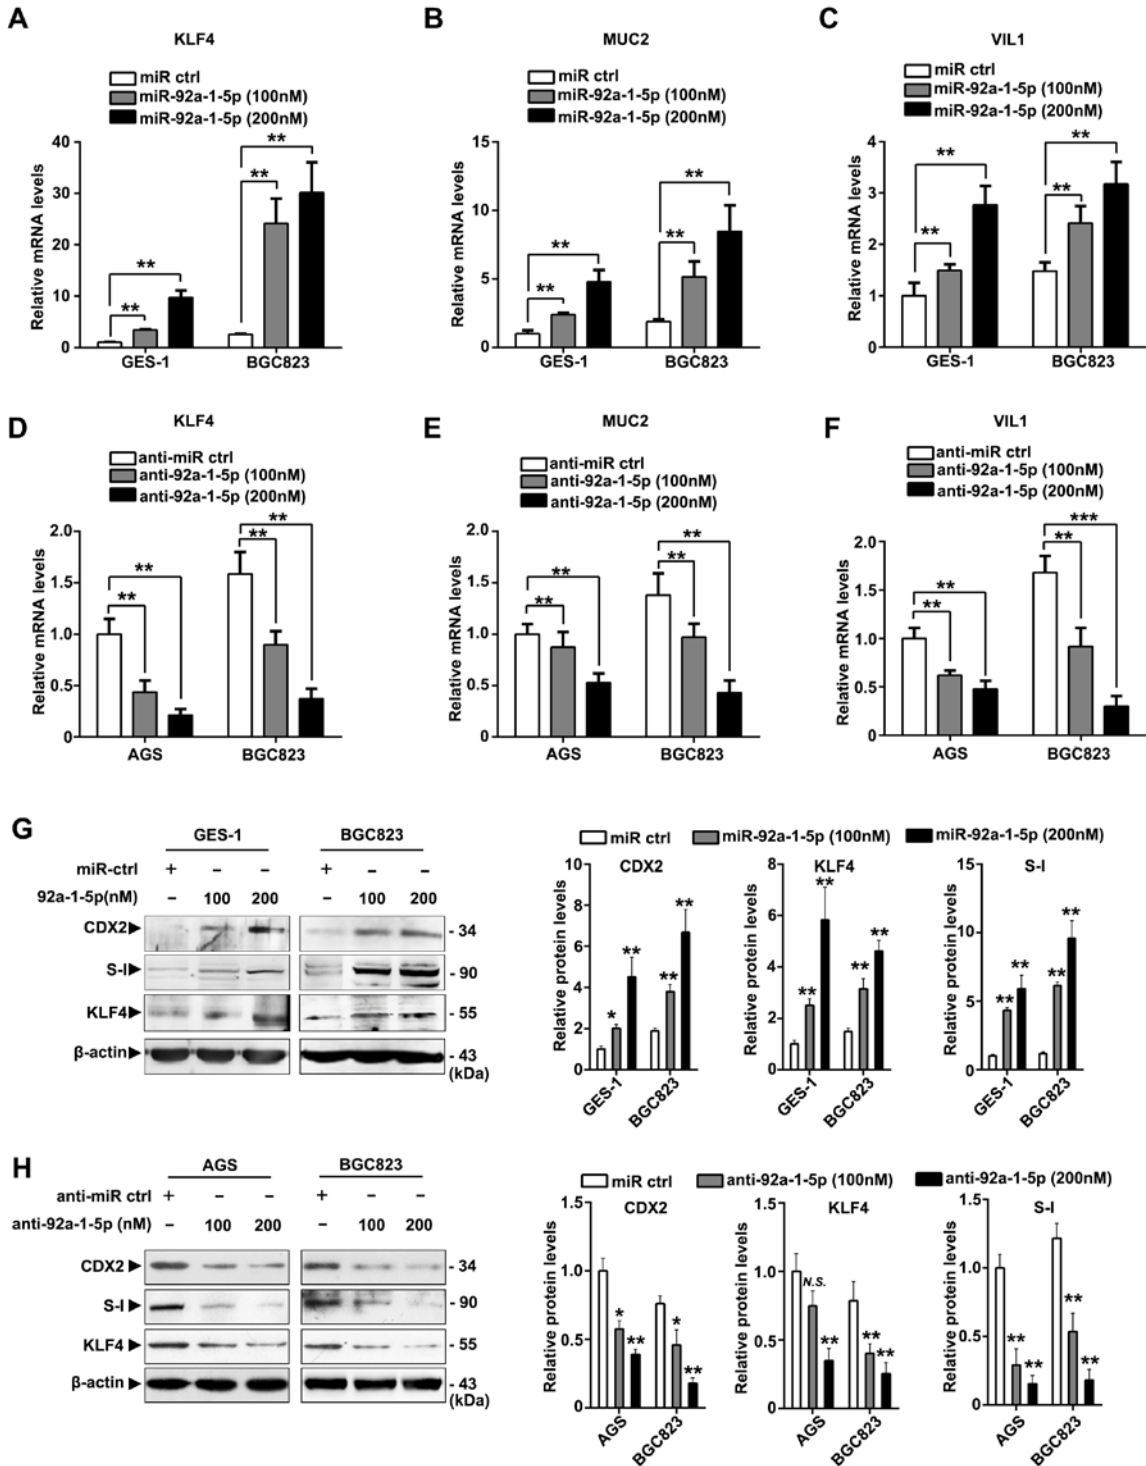

**Supplemental Figure S5 miR-92a-1-5p increases KLF4, MUC2 and VIL1 expression in gastric cells.**

(A-F) GES-1, AGS and BGC823 cells were transfected as in Fig. 3A and qRT-PCR were used to examine the expression of KLF4, MUC2 and VIL1. GAPDH RNA was used as internal control. (G) Left: Representative images of western blotting for CDX2, S-I and KLF4 in GES-1 and BGC823 cells transfected as in Fig. 3A top. Right: Quantification of protein levels of CDX2, S-I and KLF4 respectively. (H) Representative images of western blotting for CDX2, S-I and KLF4 in AGS and BGC823 cells transfected as in Fig. 3A bottom. Right: Quantification of protein levels of CDX2, S-I and KLF4 respectively.  $\beta$ -actin levels were used as internal control. Means  $\pm$  SEM of a representative experiment (n = 3) performed in triplicates are shown. \*, P < 0.05; \*\*, P < 0.01.

**Figure S6**

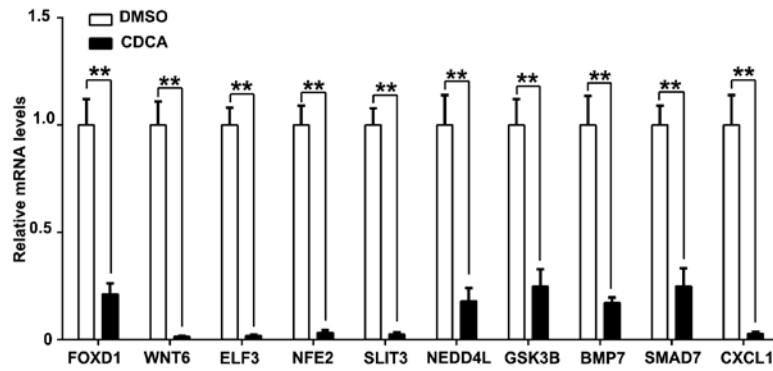

**Supplemental Figure S6 Validation of whole genome expression profiles through qRT-PCR**

Validation of mRNA levels of FOXD1, WNT6, ELF3, NFE2, NEDD4L, GSK3B, BMP7, SMAD7, CXCL1 in GES-1 cells treated with CDCA (100 $\mu$ M) for 24h as described in Fig. 1A. Means  $\pm$  SEM of a representative experiment (n = 3) performed in triplicates are shown. \*, P < 0.05; \*\*, P < 0.01.

## Figure S7

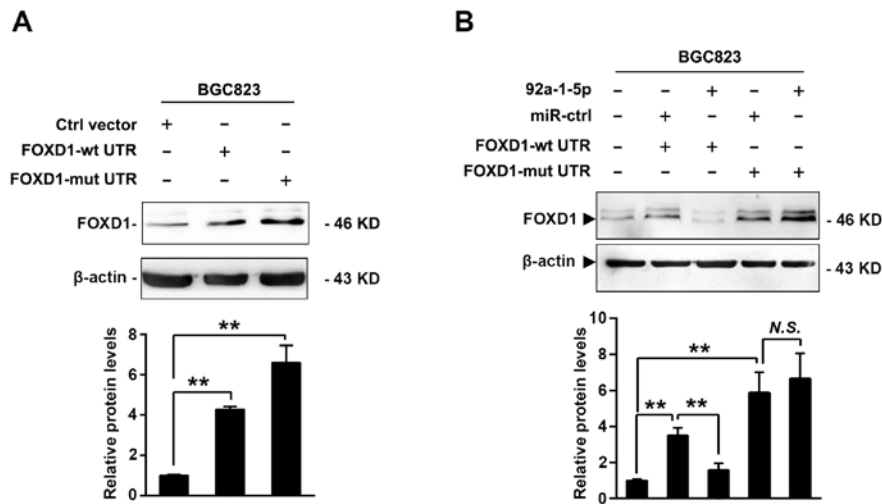

### Supplemental Figure S7 miR-92a-1-5p targets FOXD1 3'UTR.

(A) Infection of FOXD1 expressing vectors with wild-type (wt) 3'-UTR or mutant (mut) 3'-UTR to BGC823 cells and FOXD1 expression were examined by immunoblot. (B) Lentiviral vectors with FOXD1 CDS and wt-UTR or mut-UTR were infected into BGC823 cells, followed by transfection of miR-92a-1-5p agomir. FOXD1 expressions were detected using western blot. Representative images in one of three independent experiments are shown.  $\beta$ -actin levels were used as internal control in immunoblots. Means  $\pm$  SEM of a representative experiment ( $n = 3$ ) performed in triplicates are shown. \*,  $P < 0.05$ ; \*\*,  $P < 0.01$ .



## Figure S8

A

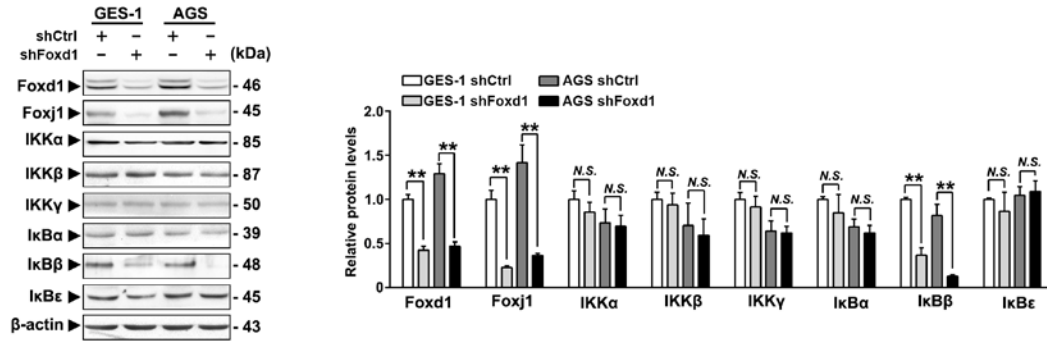

B

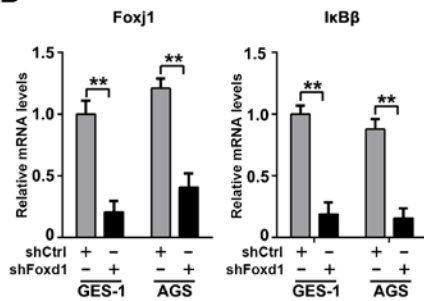

C

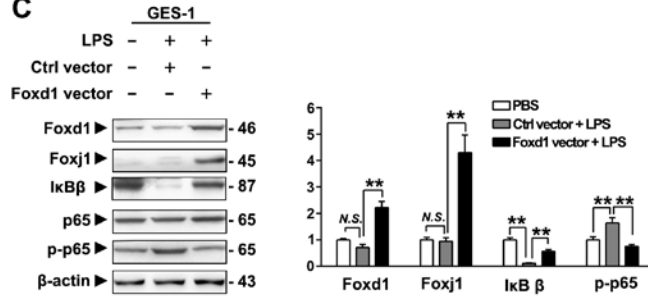

### Supplemental Figure S8 FOXD1 positively regulates expression of FOXJ1 and IκBβ.

(A) Left: Representative images of western blotting showing knockdown of FOXD1 by shRNA led to decrease of protein levels of FOXJ1 and IκBβ in GES-1 and AGS cells, while expression IKKs and other IκBs were not affected. β-actin levels were used as internal control. Right: Quantification of immunoblotting results normalized as to β-actin. (B) qRT-PCR showed knockdown of FOXD1 by shRNA led to decrease of mRNA levels of FOXJ1 and IκBβ in GES-1 and AGS cells. GAPDH RNA was used as internal control. (C) GES-1 cells were infected with FOXD1-expressing vectors, and then treated with LPS (1μg/mL) for 4h. Western blotting showed restoration of FOXD1 partially abrogated LPS-induced decrease of IκBβ and activation of p65. Means ± SEM of a representative experiment (n = 3) performed in triplicates are shown. \*, P < 0.05; \*\*, P < 0.01.

**Figure S9**

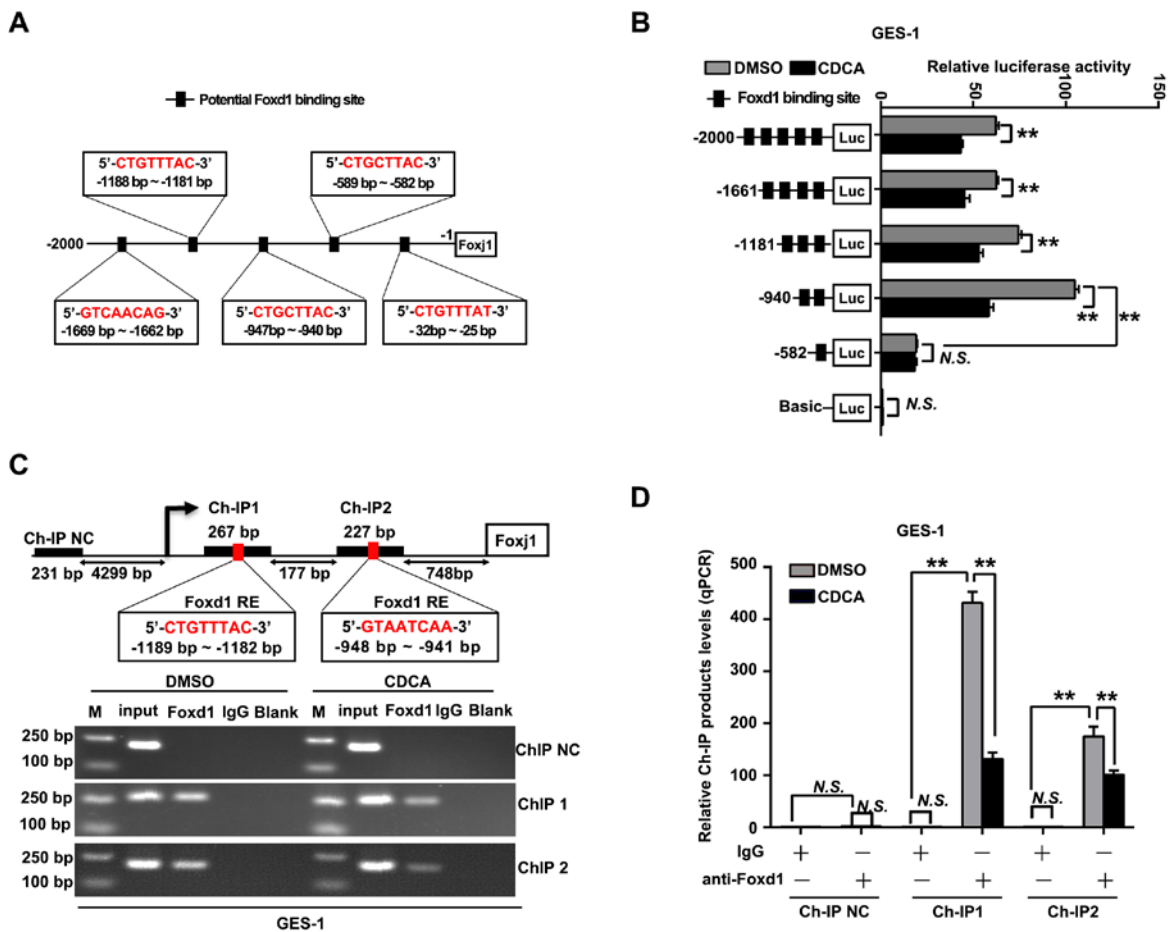

**Supplemental Figure S9 FOXD1 promotes FOXJ1 transcription by binding to its promoter.**

(A) A schematic representation of the FOXJ1 promoter containing 5 potential FOXD1 binding sites. (B) Serially truncated FOXJ1 promoter constructs were cloned to pGL3-luciferase reporter plasmids and transfected into GES-1 cells. 4h after transfection, cells were treated with CDCA (100 $\mu$ M) for 24h and the relative luciferase activities were determined 72h after ending of CDCA treatment. (C) A Ch-IP assay demonstrated the direct binding of FOXD1 to the FOXJ1 promoter in GES-1 cells. M: Marker. (D) qRT-PCR of the Ch-IP products validated the binding capacity of FOXD1 to the FOXJ1 promoter in GES-1 cells. Means  $\pm$  SEM of a representative experiment (n=3) performed in triplicates are shown. \*, P < 0.05; \*\*, P < 0.01.

**Figure S10**

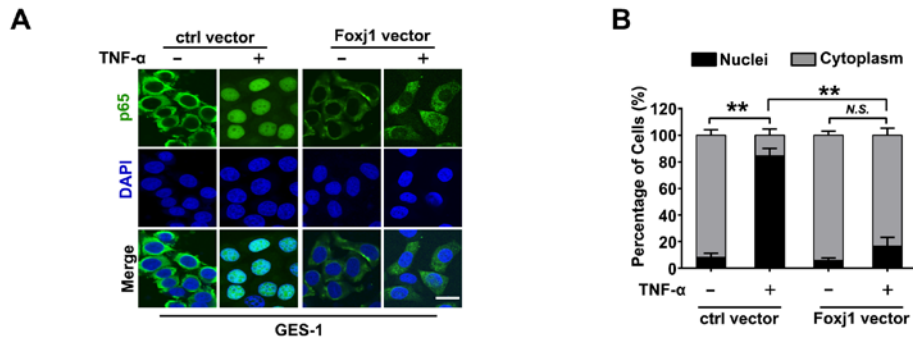

**Supplemental Figure S10 FOXJ1 inhibits TNF- $\alpha$ -induced nuclear translocation of p65.**

(A) Representative images of immunofluorescence analysis of p65 (green) in GES-1 cells while being treated with TNF- $\alpha$  (30 ng/mL) for 30 minutes. (B) Quantitation of p65 distribution in cells treated as in (A). Means  $\pm$  SEM of a representative experiment (n=3) performed in triplicates are shown. \*,  $P < 0.05$ ; \*\*,  $P < 0.01$ .

**Figure S11**

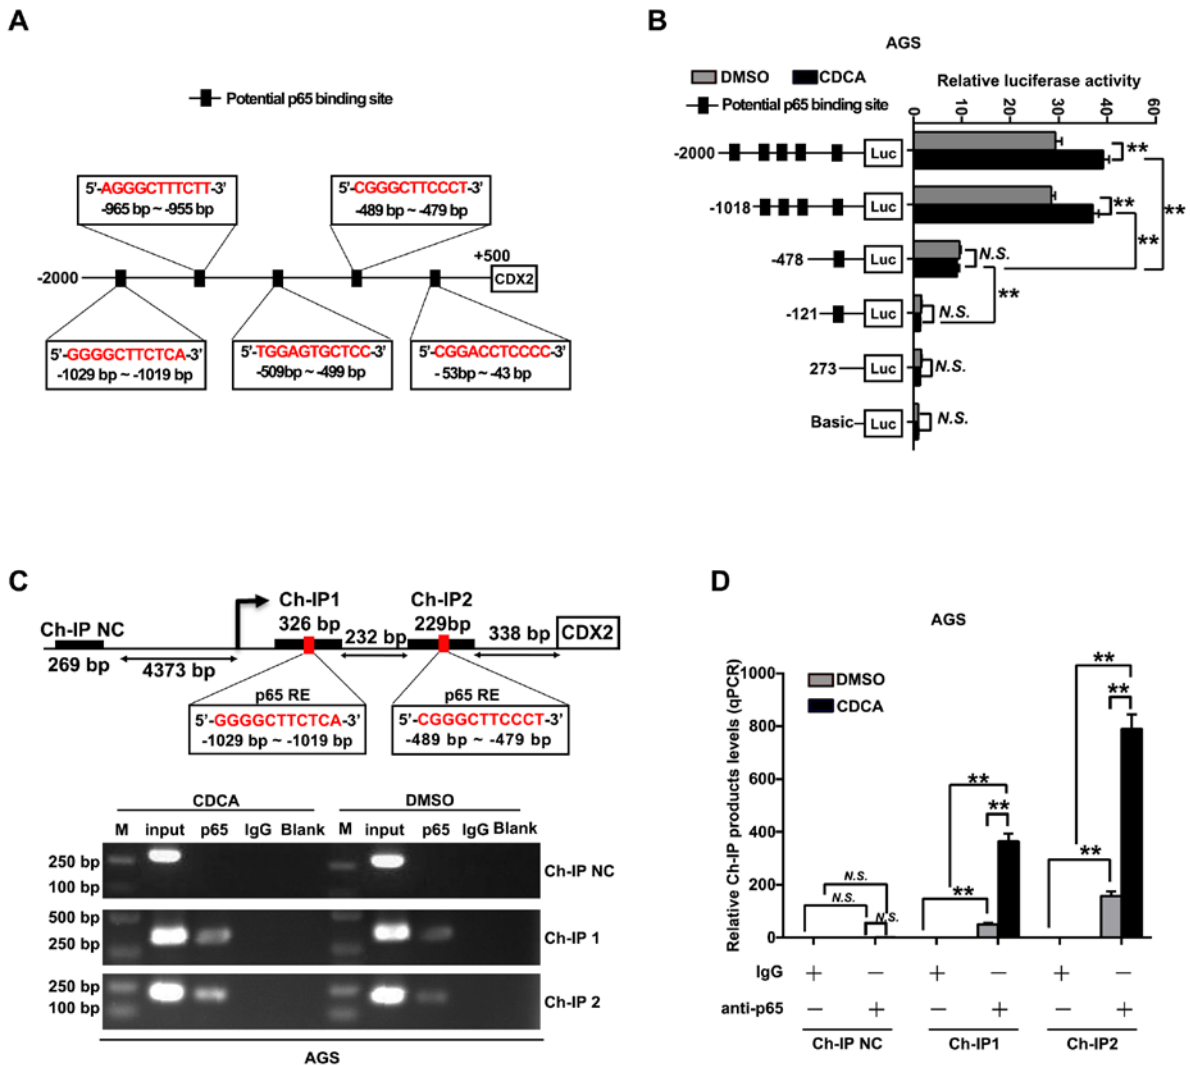

**Supplemental Figure S11 NF- $\kappa$ B promotes CDX2 expression by directly binding to its promoter.**

(A) A schematic representation of the CDX2 promoter containing 5 potential NF- $\kappa$ B binding sites. (B) Serially truncated CDX2 promoter constructs were cloned to pGL3-luciferase reporter plasmids and transfected into AGS cells. 4h after transfection, cells were treated with CDCA (100 $\mu$ M) for 24h and the relative luciferase activities were determined 24h after ending of CDCA treatment. (C) A Ch-IP assay demonstrated the direct binding of p65 to the CDX2 promoter in AGS cells. M: Marker. (D) qRT-PCR of the Ch-IP products validated the binding capacity of p65 to the CDX2 promoter in AGS cells. Means  $\pm$  SEM of a representative experiment (n = 3) performed in triplicates are shown. \*, P < 0.05; \*\*, P < 0.01.
