# Supplementary material for: MicroRNA-92a-1–5p increases CDX2 by targeting FOXD1 in bile acids-induced gastric intestinal metaplasia
Source: PubMed Central journal article supplement — Gut. 2019 Jan 11;68(10):1751–63. doi: 10.1136/gutjnl-2017-315318 (PMC6839796; doi:10.1136/gutjnl-2017-315318), 2019-01-11
Supplement: gutjnl-2017-315318supp003.pdf [file gutjnl-2017-315318supp003.pdf]

## Supplemental Tables

Table S1 Sequences of PCR primers and shRNA

| PCR primers and shRNA |                                                                                             |
|-----------------------|---------------------------------------------------------------------------------------------|
| CDX2                  | Forward: 5'- TTCACTACAGTCGCTACATCACC -3'<br>Reverse : 5'- TTGTTGATTTTCCTCTCCTTTGC -3'       |
| KLF4                  | Forward: 5'- GTGCCCCGAATAACAGCTCA -3'<br>Reverse : 5'- TTCTCACCTGTGTGGGTTTCG -3'            |
| MUC2                  | Forward: 5'- AGTCCATCCTGCTGACCATC -3'<br>Reverse : 5'- GGTGTAGGCATCGCTCTTCTC -3'            |
| VILLIN                | Forward: 5'- GGCAAGAGGAACGTGGTAGC -3'<br>Reverse : 5'- CGGTCCATTCCACTGGATGA -3'             |
| FOXD1                 | Forward: 5'- ACAACTAAGCCTTTTTGAGG -3'<br>Reverse : 5'- AAAAGTACACCAGACAAGTG -3'             |
| GAPDH                 | Forward: 5'-ATGTCGTGGAGTCTACTGGC-3'<br>Reverse: 5'-TGACCTTGCCACAGCCTTG-3'                   |
| WNT6                  | Forward: 5'-GCGGAGACGATGTGGACTTC-3'<br>Reverse: 5'-ATGCACGGATATCTCCACGG-3'                  |
| ELF3                  | Forward: 5'- CTCGAGCTCCACTCCTCAGA-3'<br>Reverse: 5'-GCTCTTCTTGCCCTCGAGACAGT-3'              |
| NFE2                  | Forward: 5'- ATTTGAGCCCCAAGCCCCAGC-3'<br>Reverse: 5'-CCAGCCTCTGTCCCCTCCAGC-3'               |
| SLIT3                 | Forward: 5'- TGATGGCAACGAGGAGAGTA-3'<br>Reverse: 5'-ACG GCTGTTAGGTGGTTTCC-3'                |
| NEDD4L                | Forward: 5'- GCTTTCCTTTAATGCACTAAACCTTTAATATTGT-3'<br>Reverse: 5'-GGTAAGACTTTGCTTGGTGGGG-3' |
| GSK3B                 | Forward: 5'- GCCAAGCCTTGTCAGAAATGA -3'<br>Reverse: 5'-TTTCTGGGCCATGGTTCTCT-3'               |
| BMP7                  | Forward: 5'- GGTGGCAGGACTGGATCATC-3'<br>Reverse: 5'-GCGCATTCTCCTTCACAGTAATAC-3'             |
| SMAD7                 | Forward: 5'- GGCTGTGTTGCTGTGAATC-3'<br>Reverse: 5'-GGTATCTGGGAGTAAGGAGGAG-3'                |
| CXCL1                 | Forward: 5'- TGCTGAACAGTGACAAATCCAAC-3'<br>Reverse: 5'-TGGGGTTGACATTTCAAAAAGAA-3'           |
| Bcl-xL                | Forward: 5'-TATCACACTTCTGTGAGACC-3'<br>Reverse : 5'-GCAATCTAGTCTCCTTTCTG-3'                 |
| CyclinD1              | Forward: 5'- CCCGCACGATTTTCATTGAAC -3'<br>Reverse : 5'- AGGGCGGATTGGAAATGAAC -3'            |
| C-MYC                 | Forward: 5'- ACACATCAGCACAACTACGC -3'<br>Reverse : 5'- CCTCTTGACATTCTCCTCGGT -3'            |
| COX-2                 | Forward: 5'- GCTGTTGCTGTTAAGTTTGG -3'<br>Reverse : 5'- ATGCATTGGAAACATCGACA -3'             |
| TNF- $\alpha$         | Forward: 5'- GGTATGAGCCCATCTATCTG -3'<br>Reverse : 5'- GCAATGATCCCCAAAGTAGAC -3'            |
| IL-6                  | Forward: 5'- GCACTGGCAGAAAACAACCT -3'<br>Reverse : 5'- GCTCTGGCTTGTTCCTCACTAC -3'           |
| IL-1 $\beta$          | Forward: 5'- AACAAAGCTGGAATTTGAGTC -3'<br>Reverse : 5'- ATCCTCTTAGCACTACCCTA -3'            |

|                            |                                                                                                                                                     |
|----------------------------|-----------------------------------------------------------------------------------------------------------------------------------------------------|
| Foxj1 promoter Ch-IP<br>NC | Forward: 5' - TATAAATGAACAAACAGCTC -3'<br>Reverse: 5' - GGAACAGTGAGAACAGGAGAG -3'                                                                   |
| Foxj1 promoter Ch-IP 1     | Forward: 5' - GAGTTAGGGTCCTGCCACCTC -3'<br>Reverse: 5' - CTCACCTTGCAGTTAGCTCTCC -3'                                                                 |
| Foxj1 promoter Ch-IP 2     | Forward: 5' - GCTCTCCAGCTCCTGGGCAG -3'<br>Reverse: 5' - CCCAATTAATTTACCAACC -3'                                                                     |
| CDX2 promoter Ch-IP<br>NC  | Forward: 5' - CCATAAAGAGCTGCGTGGCTG -3'<br>Reverse: 5' - AACTTTCTTCATGGTGTGCAC-3'                                                                   |
| CDX2 promoter Ch-IP 1      | Forward: 5' - AGTTGCTACAGGCTTCTCTG -3'<br>Reverse: 5' - CTTGGCATTTAGACAGCCCTG -3'                                                                   |
| CDX2 promoter Ch-IP 2      | Forward: 5' - GACCCATTTTTTGGCAATGAG -3'<br>Reverse: 5' - ATTGTCCCTGTTTTCCAGCTG -3'                                                                  |
| FOXJ1                      | Forward: 5' -CACGTGAAGCCTCCCTACTC-3'<br>Reverse: 5' - GGATTGAATTCTGCCAGGTG -3'                                                                      |
| IκBβ                       | Forward: 5' - AGGGCGATGAATATGATGACATC3'<br>Reverse-5'CAAACCCGACAACCG CCT3 -3'                                                                       |
| FOXD1 shRNA                | #1 5'-CCGGGCCCTTCTCCATCGAGAGCATCTCGAGAT<br>GCTCTCGATGGAGAAGGGCTTTTT-3'<br>#2 5' - CCGGCGAGGAAACAGACATCGACGTCTCGAGA<br>CGTCGATGTCTGTTTCCTCGTTTTTG-3' |
| FOXJ1 shRNA                | 5' -CCGGCCACCAATCCGCACGTGAATCTCGAGA<br>TTCACGTGCGGATTGGTGGTTTT-3'                                                                                   |

**Table S2 Upregulated miRNAs in GES-1 cells treated with CDCA.**

| <b>SystematicName</b> | <b>foldchange</b> | <b>active_sequence</b>  | <b>chr</b> | <b>mirbase.accession.No</b> |
|-----------------------|-------------------|-------------------------|------------|-----------------------------|
| hsa-miR-92a-1*        | 118.9592          | AGCATTGCAACCGATCCC      | chr13      | MIMAT0004507                |
| hsa-miR-3613-3p       | 82.96875          | GAAGGGTTGGGCTTT         | chr13      | MIMAT0017991                |
| hsa-miR-20a*          | 80.67127          | CTTTAAGTGCTCATAATGCAG   | chr13      | MIMAT0004493                |
| hsa-miR-532-3p        | 68.75526          | TGCAAGCCTTGGGTG         | chrX       | MIMAT0004780                |
| hsa-miR-4323          | 66.93926          | TCTGAGGCTGTGGGG         | chr19      | MIMAT0016875                |
| hsa-miR-486-5p        | 65.52789          | CTCGGGGCAGCTCA          | chr8       | MIMAT0002177                |
| hsa-miR-129-3p        | 62.36737          | ATGCTTTTTGGGGTAAGGG     | chr11      | MIMAT0004605                |
| hsa-miR-505*          | 59.45964          | ACATCAATACTTCCTGGCTC    | chrX       | MIMAT0004776                |
| hsa-miR-29c*          | 57.40266          | GAACACCAGGAGAAATCGGT    | chr1       | MIMAT0004673                |
| hsa-miR-634           | 57.02373          | GTCCAAAGTTGGGGTGCT      | chr17      | MIMAT0003304                |
| hsa-miR-129*          | 56.31835          | ATACTTTTTGGGGTAAGGG     | chr7       | MIMAT0004548                |
| hsa-miR-502-3p        | 51.99796          | TGAATCCTTGCCCAGG        | chrX       | MIMAT0004775                |
| hsa-miR-500a*         | 49.69044          | CAGAATCCTTGCCCAGGT      | chrX       | MIMAT0002871                |
| hsa-miR-371-5p        | 47.99462          | AGTGCCCCACAG            | chr19      | MIMAT0004687                |
| hsa-miR-132*          | 45.07946          | AGTAACAATCGAAAGCCACG    | chr17      | MIMAT0004594                |
| hsa-miR-378*          | 44.3644           | ACACAGGACCTGGAGTCA      | chr5       | MIMAT0000731                |
| hsa-miR-296-5p        | 42.06981          | ACAGGATTGAGGGGGG        | chr20      | MIMAT0000690                |
| hsa-miR-188-5p        | 40.78087          | CCCTCCACCATGC           | chrX       | MIMAT0000457                |
| hsa-miR-1237          | 39.09473          | CTGGGGGACGG             | chr11      | MIMAT0005592                |
| hsa-miR-106b*         | 36.15195          | GCAGCAAGTACCCAC         | chr7       | MIMAT0004672                |
| hsa-miR-182           | 22.59231          | AGTGTGAGTTCTACCAT       | chr7       | MIMAT0000259                |
| hsa-miR-892b          | 20.10454          | TCTACCCAGAAAGGAGCCA     | chrX       | MIMAT0004918                |
| hsa-miR-501-5p        | 19.32261          | TCTACCCAGGGACAAAG       | chrX       | MIMAT0002872                |
| hsa-miR-630           | 11.46209          | ACCTTCCCTGGTACAGA       | chr15      | MIMAT0003299                |
| hsa-miR-29b-1*        | 5.203511          | TCTAAACCACCATATGAAACCAG | chr7       | MIMAT0004514                |
| hsa-miR-550a          | 4.88794           | GGGCTCTTACTCCCT         | chr7       | MIMAT0004800                |
| hsa-miR-629*          | 4.313794          | GCTGGGCTTACGTTGG        | chr15      | MIMAT0003298                |
| hsa-miR-132           | 4.049532          | CGACCATGGCTGTAGA        | chr17      | MIMAT0000426                |
| hsa-miR-2116*         | 3.616291          | GGGAGTTCTTGGCATG        | chr15      | MIMAT0011161                |
| hsa-miR-3138          | 3.306166          | ACTCCCTCTACCTCACT       | chr4       | MIMAT0015006                |
| hsa-miR-1268          | 3.071671          | CCCCACCACCAC            | chr15      | MIMAT0005922                |
| hsa-miR-19b-1*        | 2.977145          | GCTGGATGCAAACCTGC       | chr13      | MIMAT0004491                |
| hsa-miR-92b           | 2.955225          | GGAGGCCGGGACG           | chr1       | MIMAT0003218                |
| hsa-miR-3676          | 2.844162          | AAAGCGTGGGGGAA          | chr17      | MIMAT0018100                |
| hsa-miR-1539          | 2.738363          | GGGCATCTGGGACG          | chr18      | MIMAT0007401                |
| hsa-miR-4310          | 2.607495          | GGGACATGAATGCTGC        | chr15      | MIMAT0016862                |
| hsa-miR-221*          | 2.412646          | AAATCTACATTGTATGCCAGG   | chrX       | MIMAT0004568                |
| hsa-miR-3180-5p       | 2.30178           | CGACGTGGGGCG            | chr16      | MIMAT0015057                |
| hsa-miR-1288          | 2.236374          | TCTCCAGATCAGGGCA        | chr17      | MIMAT0005942                |
| hsa-miR-33b*          | 2.232399          | GGGCTGCACTGCCG          | chr17      | MIMAT0004811                |
| hsa-miR-29a           | 2.230837          | TAACCGATTTTCAGATGGTGC   | chr7       | MIMAT0000086                |
| hsa-miR-100           | 2.196514          | CACAAGTTCGGATCTACGG     | chr11      | MIMAT0000098                |
| hsa-miR-223           | 2.177022          | TGGGGTATTTGACAACTGAC    | chrX       | MIMAT0000280                |
| hsa-miR-575           | 2.17027           | GCTCCTGTCCAACCTGGCT     | chr4       | MIMAT0003240                |
| hsa-miR-21*           | 2.1668            | ACAGCCCATCGACTG         | chr17      | MIMAT0004494                |
| hsa-miR-25*           | 2.111165          | CAATTGCCCAAGTCTCC       | chr7       | MIMAT0004498                |
| hsa-miR-362-5p        | 2.084048          | ACTCACACCTAGGTTCC       | chrX       | MIMAT0000705                |

**Table S3. miR-92a-1-5p expression in gastric IM tissue array.**

|               | Cases | miR-92a-1-5p ISH levels |      |          |        | P value |
|---------------|-------|-------------------------|------|----------|--------|---------|
|               |       | Negative                | Weak | Moderate | Strong |         |
| <b>Normal</b> | 72    | 33                      | 22   | 16       | 1      |         |
| <b>IM</b>     | 72    | 15                      | 16   | 28       | 13     | <0.0001 |

**Table S4 Overlapped targets between mRNA profile and bioinformational results**

|        |         |          |          |          |           |         |
|--------|---------|----------|----------|----------|-----------|---------|
| FOXD1  | ALDH3B1 | MEIS1    | NICN1    | MTHFR    | GPR124    | GLT8D2  |
| PRRT2  | ABAT    | ATP1B2   | LLGL2    | CORO2A   | ZNF395    | SYNGR1  |
| KRT80  | BDKRB2  | FLJ40125 | SPON2    | SAP30L   | SEMA6B    | SMC1A   |
| FXYD6  | CACNB3  | STAC2    | GPR124   | HOXC13   | SMARCC2   | TP53I11 |
| ATP8B3 | SULT1A1 | ACCN2    | DACT3    | CLMN     | TBXA2R    | YPEL2   |
| RASSF4 | RASSF4  | CXCL12   | EPB41L1  | TIMP3    | C20orf108 | KCNH3   |
| MXD4   | GDPD5   | COL1A1   | TSPAN15  | MTL5     | KIAA1549  | ALPP    |
| RASSF2 | EFNA1   | OLFML2A  | ACOT11   | PRICKLE2 | GAS2L1    | MTHFR   |
| SALL2  | ELFN2   | PALM     | VWA1     | KIAA1549 | MTL5      | MTHFR   |
| GATS   | PBX1    | MRC2     | C15orf52 | TMEM44   | BMP7      | CBFA2T3 |
| PPL    | C1orf21 | PBX1     | NRM      | PLEKHG2  | FOXA1     | MBOAT2  |
| PDE4B  | ATCAY   | COL8A2   | CCDC85A  | ATP7B    | EMP2      | MBOAT2  |
| SPINT1 | GPX3    | PLEKHA6  | PLAT     | SOX12    | GPR124    | THY1    |
| MXD4   | EFNA1   | KRT80    | JAK3     | C15orf52 | ZNF395    | DOC2A   |
| ATP2B4 | EPB41L1 | MAPT     | FOXA1    | FARP1    | SEMA6B    | AKAP12  |
| GDPD5  | GATS    | EME1     | DNAJC18  | ENSA     | SMARCC2   | ZNF618  |
| MKI67  | PDLIM2  | ADAM19   | CMBL     | HDAC1    | RPS6KA2   |         |

**Table S5 Potential Foxd1 binding site on Foxj1 promoter.**

| Score  | Relative score    | Start | End   | Strand | Predicted site sequence |
|--------|-------------------|-------|-------|--------|-------------------------|
| 8.114  | 0.852144958799813 | -1669 | -1662 | 1      | GTCAACAG                |
| 11.362 | 0.96141588557064  | -1188 | -1181 | -1     | GTAAACAG                |
| 8.245  | 0.856552129799499 | -947  | -940  | 1      | GTAATCAA                |
| 8.188  | 0.854634505776735 | -589  | -582  | -1     | GTAAGCAG                |
| 8.265  | 0.857224980333802 | -32   | -25   | -1     | ATAAACAG                |

Predicted in Jaspas using symbol FOXD1: <http://jaspar.genereg.net/>

**Table S6 p-p65 expression in gastric IM tissue array.**

|               | Cases | p-p65 IHC levels |      |          |        | P value |
|---------------|-------|------------------|------|----------|--------|---------|
|               |       | Negative         | Weak | Moderate | Strong |         |
| <b>Normal</b> | 72    | 33               | 21   | 13       | 5      |         |
| <b>IM</b>     | 72    | 10               | 14   | 17       | 31     | <0.0001 |

**Table S7 CDX2 expression in gastric IM tissue array.**

|               | Cases | CDX2 IHC levels |      |          |        | P value |
|---------------|-------|-----------------|------|----------|--------|---------|
|               |       | Negative        | Weak | Moderate | Strong |         |
| <b>Normal</b> | 72    | 56              | 11   | 3        | 2      |         |
| <b>IM</b>     | 72    | 12              | 27   | 21       | 12     | <0.0001 |

**Table S8 Potential NF- $\kappa$ B binding site on CDX2 promoter.**

| Score | Relative score    | Start | End   | Strand | Predicted site sequence |
|-------|-------------------|-------|-------|--------|-------------------------|
| 9.412 | 0.886280953038696 | -1029 | -1019 | 1      | GGGGCTTCTCA             |
| 6.148 | 0.838663983672203 | -965  | -955  | -1     | AGGGCTTTCTT             |
| 3.976 | 0.806977691556999 | -509  | -499  | -1     | TGGAGTGCTCC             |
| 9.723 | 0.890817986578211 | -489  | -479  | 1      | CGGGCTTCCT              |
| 3.938 | 0.806423327330306 | -53   | -43   | 1      | CGGACCTCCCC             |

Predicted in Jaspar using symbol NFKB1: <http://jaspar.genereg.net/>

**Table S9 FOXD1 expression in gastric IM tissue array.**

|               | Cases | FOXD1 IHC levels |      |          |        | P value |
|---------------|-------|------------------|------|----------|--------|---------|
|               |       | Negative         | Weak | Moderate | Strong |         |
| <b>Normal</b> | 72    | 0                | 2    | 13       | 57     |         |
| <b>IM</b>     | 72    | 0                | 13   | 42       | 17     | <0.0001 |
